# Supplementary material
Source: PubMed Central journal article supplement (PMC10690437)
Supplement: NIHMS1943994-supplement-Summary.pdf [file NIHMS1943994-supplement-Summary.pdf]

## Reporting Summary

Nature Portfolio wishes to improve the reproducibility of the work that we publish. This form provides structure for consistency and transparency in reporting. For further information on Nature Portfolio policies, see our [Editorial Policies](#) and the [Editorial Policy Checklist](#).

### Statistics

For all statistical analyses, confirm that the following items are present in the figure legend, table legend, main text, or Methods section.

- |     |           |
|-----|-----------|
| n/a | Confirmed |
|-----|-----------|
- The exact sample size ( $n$ ) for each experimental group/condition, given as a discrete number and unit of measurement
  - A statement on whether measurements were taken from distinct samples or whether the same sample was measured repeatedly
  - The statistical test(s) used AND whether they are one- or two-sided  
*Only common tests should be described solely by name; describe more complex techniques in the Methods section.*
  - A description of all covariates tested
  - A description of any assumptions or corrections, such as tests of normality and adjustment for multiple comparisons
  - A full description of the statistical parameters including central tendency (e.g. means) or other basic estimates (e.g. regression coefficient) AND variation (e.g. standard deviation) or associated estimates of uncertainty (e.g. confidence intervals)
  - For null hypothesis testing, the test statistic (e.g.  $F$ ,  $t$ ,  $r$ ) with confidence intervals, effect sizes, degrees of freedom and  $P$  value noted  
*Give  $P$  values as exact values whenever suitable.*
  - For Bayesian analysis, information on the choice of priors and Markov chain Monte Carlo settings
  - For hierarchical and complex designs, identification of the appropriate level for tests and full reporting of outcomes
  - Estimates of effect sizes (e.g. Cohen's  $d$ , Pearson's  $r$ ), indicating how they were calculated

*Our web collection on [statistics for biologists](#) contains articles on many of the points above.*

### Software and code

Policy information about [availability of computer code](#)

Data collection

Data analysis

For manuscripts utilizing custom algorithms or software that are central to the research but not yet described in published literature, software must be made available to editors and reviewers. We strongly encourage code deposition in a community repository (e.g. GitHub). See the Nature Portfolio [guidelines for submitting code & software](#) for further information.

### Data

Policy information about [availability of data](#)

All manuscripts must include a [data availability statement](#). This statement should provide the following information, where applicable:

- Accession codes, unique identifiers, or web links for publicly available datasets
- A description of any restrictions on data availability
- For clinical datasets or third party data, please ensure that the statement adheres to our [policy](#)

Publicly available HLA genetic datasets used in this study include Allele Frequency Net Database ([www.allelefrequencies.net](http://www.allelefrequencies.net)), IPD-IMGT/HLA Database

([www.ebi.ac.uk/ipd/imgt/hla](http://www.ebi.ac.uk/ipd/imgt/hla)), NMDP Registry Haplotype Frequencies (<http://frequency.nmdp.org>), and the 2014 1000 Genomes HLA data ([www.internationalgenome.org/category/hla](http://www.internationalgenome.org/category/hla)). The structure of the human CD94/NKG2A complex with HLA-E (3CDG) was downloaded from the Protein Data Bank ([www.RCSB.org](http://www.RCSB.org)). Source data are provided with this paper. All other data are available within the article and supplementary materials.

## Human research participants

Policy information about [studies involving human research participants and Sex and Gender in Research](#).

|                             |                                                                                                                                                                                                                                                                                                    |
|-----------------------------|----------------------------------------------------------------------------------------------------------------------------------------------------------------------------------------------------------------------------------------------------------------------------------------------------|
| Reporting on sex and gender | No sex/gender specified analysis was performed.                                                                                                                                                                                                                                                    |
| Population characteristics  | Blood samples were collected from healthy donors. Age and gender were not considered in this study. Donors were typed for HLA and screened for HCMV serostatus.                                                                                                                                    |
| Recruitment                 | Healthy blood donors were randomly recruited from the NIH Blood Bank and University Medical Center, Hamburg-Eppendorf. There was no potential self-selection bias or other biases present in the donor sets used in this study.                                                                    |
| Ethics oversight            | Blood samples were collected at the NIH Blood Bank under an IRB-approved protocol (99-CC-0168) or as byproducts of allogeneic blood donation, and at the University Medical Center Hamburg-Eppendorf under a protocol approved by the ethical committee of the Landesärztekammer Hamburg (PV4780). |

Note that full information on the approval of the study protocol must also be provided in the manuscript.

## Field-specific reporting

Please select the one below that is the best fit for your research. If you are not sure, read the appropriate sections before making your selection.

Life sciences  Behavioural & social sciences  Ecological, evolutionary & environmental sciences

For a reference copy of the document with all sections, see [nature.com/documents/nr-reporting-summary-flat.pdf](https://nature.com/documents/nr-reporting-summary-flat.pdf)

## Life sciences study design

All studies must disclose on these points even when the disclosure is negative.

|                 |                                                                                                                                                                                                                                                                                                                                                                                                                                                           |
|-----------------|-----------------------------------------------------------------------------------------------------------------------------------------------------------------------------------------------------------------------------------------------------------------------------------------------------------------------------------------------------------------------------------------------------------------------------------------------------------|
| Sample size     | Blood donor sample size was restricted by the availability of human specimens and was sufficient to detect the effect of the SP variation on NK cell responses. The BLCL samples were selected based on HLA genotypes so that each comparison group contained at least 10 samples. To maximize the statistical power, we chose the maximum number of BLCLs that we were able to process in flow cytometry assay on one day.                               |
| Data exclusions | No data/sample was excluded.                                                                                                                                                                                                                                                                                                                                                                                                                              |
| Replication     | Triplicate measurements were performed in the experiments using cell lines. Due to limited blood volume, a single measurement was performed for each donor. ELISA-based peptide binding and thermal stability assays were repeated six times. SPR measurements were performed in two independent experiments. Mass spectrometry data represent three technical replicates. Replication of experiments was successful and demonstrated consistent results. |
| Randomization   | Blood donors were randomly recruited and were not allocated into groups. BLCLs were grouped based on their HLA genotypes.                                                                                                                                                                                                                                                                                                                                 |
| Blinding        | Blinding was not applicable to the experiment with donor NK cells since there was no grouping of donors. All experimental data collection and analyses were performed objectively and did not require blinding.                                                                                                                                                                                                                                           |

## Reporting for specific materials, systems and methods

We require information from authors about some types of materials, experimental systems and methods used in many studies. Here, indicate whether each material, system or method listed is relevant to your study. If you are not sure if a list item applies to your research, read the appropriate section before selecting a response.

## Materials &amp; experimental systems

## Methods

| n/a                                 | Involved in the study                                     |
|-------------------------------------|-----------------------------------------------------------|
| <input type="checkbox"/>            | <input checked="" type="checkbox"/> Antibodies            |
| <input type="checkbox"/>            | <input checked="" type="checkbox"/> Eukaryotic cell lines |
| <input checked="" type="checkbox"/> | <input type="checkbox"/> Palaeontology and archaeology    |
| <input checked="" type="checkbox"/> | <input type="checkbox"/> Animals and other organisms      |
| <input checked="" type="checkbox"/> | <input type="checkbox"/> Clinical data                    |
| <input checked="" type="checkbox"/> | <input type="checkbox"/> Dual use research of concern     |

| n/a                                 | Involved in the study                              |
|-------------------------------------|----------------------------------------------------|
| <input checked="" type="checkbox"/> | <input type="checkbox"/> ChIP-seq                  |
| <input type="checkbox"/>            | <input checked="" type="checkbox"/> Flow cytometry |
| <input checked="" type="checkbox"/> | <input type="checkbox"/> MRI-based neuroimaging    |

## Antibodies

## Antibodies used

Mouse anti human Anti-HLA-E APC-conjugated, Clone 3D12; BioLegend; Cat# 342606; 1:20  
 Rat Anti-FLAG APC-conjugated, Clone L5; BioLegend; Cat# 637308; 1:50  
 Rat Anti-FLAG BV421-conjugated, Clone L5; BioLegend; Cat# 637322; 1:50  
 Mouse anti human Anti-CD3 PerCP/Cy5.5-conjugated, Clone UCHT1; BioLegend; Cat# 300430; 1:50  
 Mouse anti human Anti-CD3 AF488-conjugated, Clone UCHT1; BioLegend; Cat# 300415; 1:50  
 Mouse anti human Anti-CD3 AF700-conjugated, Clone SK7; BioLegend; Cat# 344822; 1:100  
 Mouse anti human Anti-CD4 BV711-conjugated, Clone PRA-T4; BioLegend; Cat# 300558; 1:100  
 Mouse anti human Anti-CD4 PE/Cy7-conjugated, Clone PRA-T4; BioLegend; Cat# 300512; 1:100  
 Mouse anti human Anti-CD8 AF700-conjugated, Clone SK1; BioLegend; Cat# 344724; 1:50  
 Mouse anti human Anti-CD14 BV421-conjugated, Clone HCD14; BioLegend; Cat# 325628; 1:50  
 Mouse anti human Anti-CD19 FITC-conjugated, Clone HIB19; BioLegend; Cat# 302206; 1:50  
 Mouse anti human Anti-CD56 PerCP/Cy5.5-conjugated, Clone HCD56; BioLegend; Cat# 318322; 1:50  
 Mouse anti human Anti-CD56 BV711-conjugated, Clone HCD56; BioLegend; Cat# 318336; 1:50  
 Mouse anti human Anti-CD69 BV421-conjugated, Clone FN50; BioLegend; Cat# 310930; 1:50  
 Mouse anti human Anti-CD94 PE-conjugated, Clone DX22; BioLegend; Cat# 305506; 1:100  
 Mouse anti human Anti-CD107a BV421-conjugated, Clone H4A3; BioLegend; Cat# 328626; 1:20  
 Mouse anti human Anti-HLA-DR BV785-conjugated, Clone L243; BioLegend; Cat# 307642; 1:50  
 Mouse anti human Anti-NKG2A APC/Fire750-conjugated, Clone S19004C; BioLegend; Cat# 375116; 1:50  
 Mouse anti human Anti-NKG2C PE-conjugated, Clone S19005E; BioLegend; Cat# 375004; 1:50  
 Human Anti-NKG2A PE-Vio® 770-conjugated, Clone REA110; Miltenyi; Cat# 130-114-093; 1:50  
 Human Anti-NKG2A PE-conjugated, Clone REA110; Miltenyi; Cat# 130-114-093; 1:50  
 Human IgG1 isotype control PE-conjugated, Clone REA293; Miltenyi; Cat# 130-113-450; 1:50  
 Human Anti-NKG2C PE-conjugated, Clone REA205; Miltenyi; Cat# 130-119-776; 1:50  
 Human Anti-NKG2C Vio® Bright FITC-conjugated, Clone REA205; Miltenyi; Cat# 130-117-707; 1:50  
 Mouse anti human Anti-CD14 BD Horizon™ BUV395-conjugated, Clone MφP9; BD; Cat# 563561; 1:50  
 Mouse anti human Anti-NKG2A PC7-conjugated, Clone Z199; Beckman Coulter; Cat# B10246; 1:25  
 Rabbit anti human Anti-beta-2 Microglobulin HRP-conjugated, polyclonal; Thermo Fisher; Cat# PA1-29662; 1:1000  
 Mouse anti human Anti-HLA-E Purified-conjugated, Clone 3D12; BioLegend; Cat# 342602; 1:500

## Validation

All antibodies were tested with proper negative controls including isotype control staining and/or cells that are negative for the corresponding antigen, and titrated using cells expressing the corresponding antigen. Validation statements for all antibodies can be found on vendors' websites using Cat# or in the Antibody Registry database (<https://antibodyregistry.org>) using AB ID.

## Flow cytometry:

Mouse anti human Anti-HLA-E APC-conjugated, Clone 3D12; BioLegend; Cat# 342606; AB\_2565261  
 Rat Anti-FLAG APC-conjugated, Clone L5; BioLegend; Cat# 637308; AB\_2561497  
 Rat Anti-FLAG BV421-conjugated, Clone L5; BioLegend; Cat# 637322; AB\_2750061  
 Mouse anti human Anti-CD3 PerCP/Cy5.5-conjugated, Clone UCHT1; BioLegend; Cat# 300430; AB\_893299  
 Mouse anti human Anti-CD3 AF488-conjugated, Clone UCHT1; BioLegend; Cat# 300415; AB\_389310  
 Mouse anti human Anti-CD3 AF700-conjugated, Clone SK7; BioLegend; Cat# 344822; AB\_2563420  
 Mouse anti human Anti-CD4 BV711-conjugated, Clone PRA-T4; BioLegend; Cat# 300558; AB\_2564393  
 Mouse anti human Anti-CD4 PE/Cy7-conjugated, Clone PRA-T4; BioLegend; Cat# 300512; AB\_314080  
 Mouse anti human Anti-CD8 AF700-conjugated, Clone SK1; BioLegend; Cat# 344724; AB\_2562790  
 Mouse anti human Anti-CD14 BV421-conjugated, Clone HCD14; BioLegend; Cat# 325628; AB\_2563296  
 Mouse anti human Anti-CD19 FITC-conjugated, Clone HIB19; BioLegend; Cat# 302206; AB\_314236  
 Mouse anti human Anti-CD56 PerCP/Cy5.5-conjugated, Clone HCD56; BioLegend; Cat# 318322; AB\_893389  
 Mouse anti human Anti-CD56 BV711-conjugated, Clone HCD56; BioLegend; Cat# 318336; AB\_2562417  
 Mouse anti human Anti-CD69 BV421-conjugated, Clone FN50; BioLegend; Cat# 310930; AB\_2561909  
 Mouse anti human Anti-CD94 PE-conjugated, Clone DX22; BioLegend; Cat# 305506; AB\_314536  
 Mouse anti human Anti-CD107a BV421-conjugated, Clone H4A3; BioLegend; Cat# 328626; AB\_11203537  
 Mouse anti human Anti-HLA-DR BV785-conjugated, Clone L243; BioLegend; Cat# 307642; AB\_2563461  
 Mouse anti human Anti-NKG2A APC/Fire750-conjugated, Clone S19004C; BioLegend; Cat# 375116; AB\_2888866  
 Mouse anti human Anti-NKG2C PE-conjugated, Clone S19005E; BioLegend; Cat# 375004; AB\_2888871  
 Human Anti-NKG2A PE-Vio® 770-conjugated, Clone REA110; Miltenyi; Cat# 130-114-093; AB\_2726449  
 Human Anti-NKG2A PE-conjugated, Clone REA110; Miltenyi; Cat# 130-114-093; AB\_2726171  
 Human IgG1 isotype control, PE-conjugated, Clone REA293; Miltenyi; Cat# 130-113-450; AB\_2733892  
 Human Anti-NKG2C PE-conjugated, Clone REA205; Miltenyi; Cat# 130-119-776; AB\_2751835  
 Human Anti-NKG2C Vio® Bright FITC-conjugated, Clone REA205; Miltenyi; Cat# 130-117-707; AB\_2728023  
 Mouse anti human Anti-CD14 BD Horizon™ BUV395-conjugated, Clone MφP9; BD; Cat# 563561; AB\_2744288

Mouse anti human Anti-NKG2A PC7-conjugated, Clone Z199; Beckman Coulter; Cat# B10246; AB\_2687887

ELISA-based peptide binding assay:

Rabbit anti human Anti-beta-2 Microglobulin HRP-conjugated, polyclonal; Thermo Fisher; Cat# PA1-29662; AB\_1956329

Mouse anti human Anti-HLA-E Purified-conjugated, Clone 3D12; BioLegend; Cat# 342602; AB\_1659247

## Eukaryotic cell lines

Policy information about [cell lines and Sex and Gender in Research](#)

|                                                                      |                                                                                                                                                |
|----------------------------------------------------------------------|------------------------------------------------------------------------------------------------------------------------------------------------|
| Cell line source(s)                                                  | 721.221: Sigma-Aldrich, Cat# SCC275; NKL: gift from Dr. Daniel Geraghty; Jurkat cells: ATCC, Cat# TIB-152; HEK293T cells: ATCC, Cat# CRL-3216. |
| Authentication                                                       | Cell lines used were not authenticated.                                                                                                        |
| Mycoplasma contamination                                             | Cell lines were not tested for mycoplasma contamination.                                                                                       |
| Commonly misidentified lines<br>(See <a href="#">ICLAC</a> register) | No commonly misidentified cell lines were used in this study.                                                                                  |

## Flow Cytometry

### Plots

Confirm that:

- The axis labels state the marker and fluorochrome used (e.g. CD4-FITC).
- The axis scales are clearly visible. Include numbers along axes only for bottom left plot of group (a 'group' is an analysis of identical markers).
- All plots are contour plots with outliers or pseudocolor plots.
- A numerical value for number of cells or percentage (with statistics) is provided.

### Methodology

|                           |                                                                                                                                                                                                                                                                                                                                                                                                                                                                                                                                                                                               |
|---------------------------|-----------------------------------------------------------------------------------------------------------------------------------------------------------------------------------------------------------------------------------------------------------------------------------------------------------------------------------------------------------------------------------------------------------------------------------------------------------------------------------------------------------------------------------------------------------------------------------------------|
| Sample preparation        | Cells were washed two times in PBS/2% FBS and stained with appropriate antibodies and/or 7-AAD in the dark at 4 °C for 30 min. Following staining, samples were washed two times in PBS/2% FBS and resuspended in the same buffer for flow cytometry analysis.                                                                                                                                                                                                                                                                                                                                |
| Instrument                | BD LSRFortessa™ Cell Analyzer and MACSQuant Analyzer 16.                                                                                                                                                                                                                                                                                                                                                                                                                                                                                                                                      |
| Software                  | Data collection: FACSDiva 9.0 and MACSQuantify 2.13. Data analysis: FlowJo 10.8.1 and FlowLogic 8.7.                                                                                                                                                                                                                                                                                                                                                                                                                                                                                          |
| Cell population abundance | No cell sorting was performed.                                                                                                                                                                                                                                                                                                                                                                                                                                                                                                                                                                |
| Gating strategy           | Gating on FSC-A/SSC-A was performed to exclude debris, and singlets were subsequently gated using FSC-A/FSC-H. Live cells were gated using 7-AAD. Blood cell subsets were gated from live singlets based on expression of specific markers: CD14+ (monocytes), CD19+ (B cells), CD14-CD19-CD3-CD56+ (NK cells), CD14-CD19-CD3+CD4+ (CD4 T cells) and CD14-CD19-CD3+CD8+ (CD8 T cells). Jurkat reporter cells were gated from live singlets as CD3+NKG2A+ or CD3+NKG2C+ cells. Purified NK cell subsets were gated from live singlets as CD3-CD56+NKG2A+NKG2C- or CD3-CD56+NKG2A-NKG2C+ cells. |

- Tick this box to confirm that a figure exemplifying the gating strategy is provided in the Supplementary Information.
