# Supplementary material
Source: PubMed Central journal article supplement (PMC10690437)
Supplement: NIHMS1943994-supplement-Supplementary.pdf [file NIHMS1943994-supplement-Supplementary.pdf]

# **HLA class I signal peptide polymorphism determines the level of CD94/NKG2–HLA-E-mediated regulation of effector cell responses**

---

In the format provided by the authors and unedited

# Supplementary Figure 1

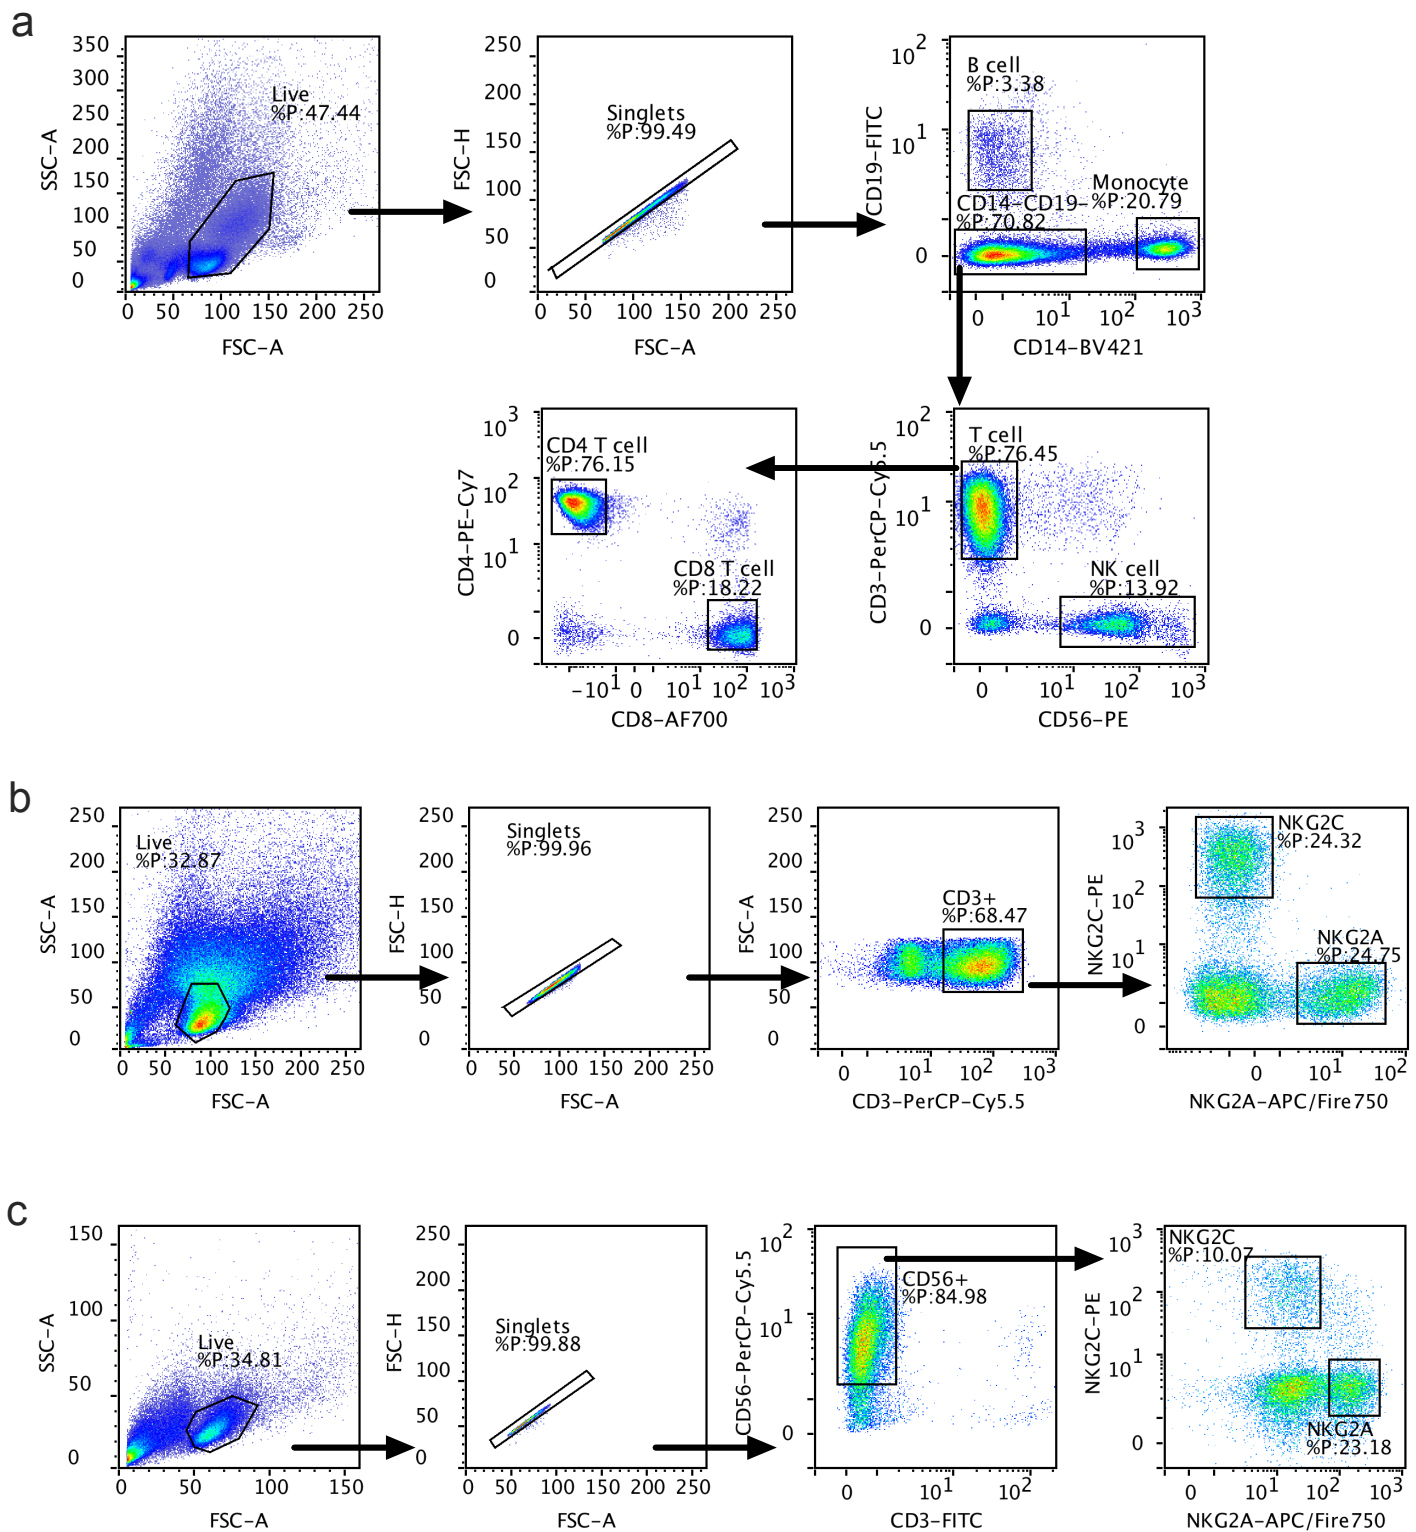

**Supplementary Figure 1. Gating strategy in flow cytometry analysis.** **a**, Gating of PBMC subtypes. Cell subtypes were defined as follows: monocytes -  $CD14^+$ , B cells -  $CD19^+$ , NK cells -  $CD14^-CD19^-CD3^-CD56^+$ , CD4 T cells -  $CD14^-CD19^-CD3^+CD4^+$ , and CD8 T cells -  $CD14^-CD19^-CD3^+CD8^+$ . **b**, Gating of Jurkat reporter cells within target-effector co-cultures. Jurkat<sup>NKG2A</sup> and Jurkat<sup>NKG2C</sup> were defined as  $CD3^+NKG2A^+$  and  $CD3^+NKG2C^+$  cells, respectively. **c**, Gating of NK cell subtypes within purified blood NK cells.  $NKG2A^+NKG2C^-$  and  $NKG2A^-NKG2C^+$  NK cells were defined as  $CD3^-CD56^+NKG2A^+NKG2C^-$  and  $CD3^-CD56^+NKG2A^-NKG2C^+$ , respectively.
