# Supplementary material
Source: PubMed Central journal article supplement (PMC10690437)
Supplement: NIHMS1943994-supplement-Supplementary_Table_1.pdf [file NIHMS1943994-supplement-Supplementary_Table_1.pdf]

**Supplementary Table 1. Equilibrium dissociation constant ( $K_D$ ) values for HLA-E\*01:03/VL9 binding to CD94/NKG2<sup>1</sup>.**

| <b>SP</b>          | <b>VL9</b>       | <b>CD94/NKG2A</b> | <b>CD94/NKG2C</b> |
|--------------------|------------------|-------------------|-------------------|
| <b>1A/3A/4A/2C</b> | <b>VMAPRTLLL</b> | 1.70 (1.50-1.93)  | 4.97 (4.80-5.14)  |
| <b>2A</b>          | <b>VMAPRTLVL</b> | 2.10 (1.93-2.28)  | 6.52 (6.41-6.63)  |
| <b>5A</b>          | <b>VMPRTLLL</b>  | 1.42 (1.22-1.65)  | 4.21 (4.06-4.37)  |
| <b>6B/7B</b>       | <b>VMAPRTVLL</b> | 2.98 (2.81-3.15)  | 8.00 (7.84-8.16)  |
| <b>1C</b>          | <b>VMAPRTLIL</b> | 1.33 (1.15-1.53)  | 4.35 (4.24-4.46)  |
| <b>G</b>           | <b>VMAPRTLFL</b> | 0.18 (0.15-0.21)  | 0.71 (0.59-0.86)  |

<sup>1</sup> $K_D$  values determined by SPR are shown in  $\mu\text{M}$  with 95% CI range in brackets. The data are representative of two independent experiments.
